# Supplementary material for: Recovering degraded quasi-solid-state dye-sensitized solar cells by applying electrical pulses
Source: Royal Society of Chemistry journal article supplement (doi:10.1039/c3cp51071a), 2013-01-01
Supplement: c3cp51071a.pdf [file c3cp51071a.pdf]

# Recovering degraded quasi-solid-state dye-sensitized solar cells by applying electrical pulses

*Xi Zhang<sup>a</sup>, Xuezhen Huang<sup>a</sup>, and Hongrui Jiang<sup>a,b,\*</sup>*

<sup>a</sup>Department of Electrical and Computer Engineering, University of Wisconsin-Madison, Madison, WI, 53706, USA. Tel: 608-265-9418. Fax: 608-262-1267. E-mail: hongrui@engr.wisc.edu

<sup>b</sup>Materials Science Program, University of Wisconsin-Madison, Madison, WI, 53706, USA.

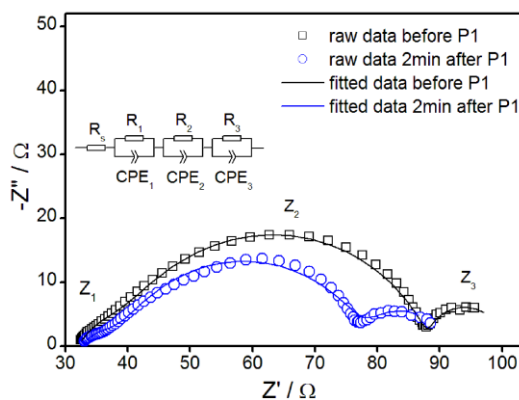

**Fig. S1** Simulated Nyquist plots of C1 before and after P1. Inset is the equivalent circuit model for C1.

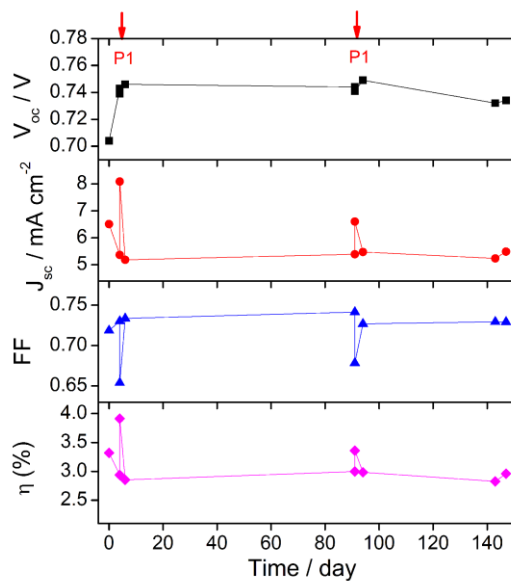

**Fig. S2** Photovoltaic parameters of C1 during 147 days, during which P1 pulses were applied twice: on the 4th day and the 91<sup>st</sup> day, respectively.

**Table S1** Results of each impedance from simulated Nyquist plots of C1 before and after P1.

| <i>treatment</i> | $R_0 / \Omega$ | $R_1 / \Omega$ | $R_2 / \Omega$ | $R_3 / \Omega$ |
|------------------|----------------|----------------|----------------|----------------|
| before P1        | 32.18          | 7.231          | 49.14          | 11.60          |
| 2min after P1    | 32.67          | 6.219          | 39.66          | 12.16          |

**Table S2** *J-V* parameters of C2 under AM 1.5G illumination in different degradation and pulse-treatment conditions.

| <i>day(s) after fabrication</i> | <i>treatment</i>  | $V_{oc} / V$ | $J_{sc} / mA\ cm^{-2}$ | <i>FF</i> | $\eta$ (%) |
|---------------------------------|-------------------|--------------|------------------------|-----------|------------|
| 0                               | none              | 0.640        | 8.47                   | 0.607     | 3.29       |
| 14                              | before P1~P3      | 0.671        | 5.90                   | 0.672     | 2.66       |
| 14                              | 10min after P1~P3 | 0.589        | 6.55                   | 0.508     | 1.96       |
| 48                              | none              | 0.512        | 0.523                  | 0.586     | 0.157      |
